# Supplementary material
Source: ML conference proceedings conference paper supplement (https://openreview.net/forum?id=fadoo8Xs6pH)
Supplement: supplementary_material [file attachment]

## A PROOF

### A.1 BUILDING THE HARD FUNCTION $G$

For any  $r \in \mathbb{R}$  with  $|r| < 1$ , by mapping  $x \mapsto rx$  and using homogeneity of  $s_\lambda$  and  $V$ , we define  $G$  via the generating function identity:

$$G := \frac{C}{\sqrt{N!}} \sum_{\lambda \text{ doubly even}} r^{(|\lambda| + \frac{N(N-1)}{2})} s_\lambda \cdot V = C\sqrt{N!} \cdot \prod_{i < j} \frac{1}{1 - r^4 x_i^2 x_j^2} \cdot \mathcal{A}(\phi_1^{(r)} \otimes \cdots \otimes \phi_N^{(r)}), \quad (21)$$

where

$$\phi_j^{(r)}(x_i) = \begin{cases} rx_i((rx_i)^2)^{N/2-j}(1 + (rx_i)^4)^{j-1} & \text{if } 1 \leq j \leq N/2 \\ ((rx_i)^2)^{N-j}(1 + (rx_i)^4)^{j-1-N/2} & \text{if } N/2 + 1 \leq j \leq N \end{cases} \quad (22)$$

where  $C$  is chosen to normalize  $G$ .

Note that from the RHS, it is clear that  $G$  is written in the form of a Jastrow ansatz. We will discuss efficiency of computing  $G$  further below.

It remains to choose  $r$  and  $C$  such that  $\|G\| = 1$ . Note that, if  $p(k)$  denotes the number of partitions of  $k$ , and  $p'(k)$  denotes the number of doubly even partitions of  $k$ , it's easy to see that

$$p'(k) = \begin{cases} p(k/4) & k \equiv 0 \pmod{4} \\ 0 & \text{else} \end{cases} \quad (23)$$

So we calculate by orthogonality:

$$\|G\|^2 = \frac{C^2}{N!} \left\langle \sum_{\lambda \text{ doubly even}} r^{(|\lambda| + \frac{N(N-1)}{2})} s_\lambda \cdot V, \sum_{\mu \text{ doubly even}} r^{(|\mu| + \frac{N(N-1)}{2})} s_\mu \cdot V \right\rangle \quad (24)$$

$$= C^2 r^{N(N-1)} \sum_{\lambda \text{ doubly even}} r^{2|\lambda|} \quad (25)$$

$$= C^2 r^{N(N-1)} \sum_{k=0}^{\infty} r^{2k} p'(k) \quad (26)$$

$$= C^2 r^{N(N-1)} \sum_{k=0}^{\infty} r^{8k} p(k) \quad (27)$$

$$= C^2 r^{N(N-1)} \prod_{k=1}^{\infty} \frac{1}{1 - r^{8k}} \quad (28)$$

where in the last line we employ the generating function for partition numbers. Then setting  $C = (r^{-N(N-1)} \prod_{k=1}^{\infty} (1 - r^{8k}))^{1/2}$  gives  $\|G\| = 1$ .

### A.2 FROM TENSORS TO MATRICES

The point of choosing  $G$  in this way, is it enables a simple flattening argument, where we can reduce comparing tensors to comparing matrices.

Note again that terms of the form  $x^\alpha$  for  $\alpha \in \mathbb{N}^N$  are orthonormal. Hence, we derive an initial lower bound by Bessel's inequality:

$$\|F - G\|^2 \geq \sum_{\alpha \in \mathbb{N}^N} (\langle F, x^\alpha \rangle - \langle G, x^\alpha \rangle)^2. \quad (29)$$

Note that by antisymmetry of  $F$  and  $G$ , if  $\alpha$  doesn't have distinct elements then

$$\langle F, x^\alpha \rangle = \langle G, x^\alpha \rangle = 0. \quad (30)$$

To see this, suppose  $\alpha_1 = \alpha_2$ , and let  $P_{12}$  be the permutation operator defined by

$$P_{12}F(x_1, x_2, x_3, \dots) = F(x_2, x_1, x_3, \dots) \quad (31)$$

It's easy to see  $P_{12}$  is a symmetric operator with respect to  $\langle \cdot, \cdot \rangle$ . Then for any antisymmetric function  $H$ ,

$$\langle H, x^\alpha \rangle = \langle H, P_{12}x^\alpha \rangle \quad (32)$$

$$= \langle P_{12}H, x^\alpha \rangle \quad (33)$$

$$= -\langle H, x^\alpha \rangle \quad (34)$$

which implies  $\langle H, x^\alpha \rangle = 0$ .

Furthermore, let us define the equivalence class  $\sim$  as via  $\alpha \sim \alpha'$  if there exists a permutation  $\pi$  such that  $\alpha = \pi \circ \alpha'$ . Then by similar reasoning,  $\alpha \sim \alpha'$  implies:

$$\langle F, x^\alpha \rangle = (-1)^\pi \langle F, x^{\alpha'} \rangle \quad (35)$$

$$\langle G, x^\alpha \rangle = (-1)^\pi \langle G, x^{\alpha'} \rangle \quad (36)$$

So define  $\mathbb{N}_{\geq}^N$  to be the set of strictly decreasing non-negative integer vectors of length  $N$ , then we have:

$$\|F - G\|^2 \geq N! \cdot \sum_{\alpha \in \mathbb{N}_{\geq}^N} (\langle F, x^\alpha \rangle - \langle G, x^\alpha \rangle)^2 \quad (37)$$

Now, we can consider a flattening argument, by passing from tensors to matrices. Define

$$\mathfrak{A}_1 = \{\beta \in \mathbb{N}_{\geq}^{N/2} : \beta_i \equiv 1 \pmod{2}\} \quad (38)$$

$$\mathfrak{A}_2 = \{\gamma \in \mathbb{N}_{\geq}^{N/2} : \gamma_i \equiv 0 \pmod{2}\} \quad (39)$$

For  $\beta \in \mathfrak{A}_1$  and  $\gamma \in \mathfrak{A}_2$ , let  $\beta \cup \gamma \in \mathbb{N}^N$  be the concatenation of  $\beta$  and  $\gamma$ .

Then given a function acting on  $N$  particles such as  $G$ , we can map  $G$  to a (infinite-dimensional) matrix  $M$  indexed by the sets  $\mathfrak{A}_1$  and  $\mathfrak{A}_2$ :

$$M(G) = [\langle G, x^{\beta \cup \gamma} \rangle]_{\beta, \gamma} \quad (40)$$

Let us calculate the entries of this matrix. Let  $\delta = (N-1, N-2, \dots, 1, 0)$ , and observe that:

$$\langle s_\lambda \cdot V, x^{\beta \cup \gamma} \rangle = \begin{cases} \pm 1 & \lambda + \delta \sim \beta \cup \gamma, \\ 0 & \text{otherwise.} \end{cases} \quad (41)$$

Note that ambiguity in sign depends on the sign of the permutation that maps  $\lambda + \delta$  to  $\beta \cup \gamma$ .

By definition,  $G$  is a sum of terms of the form  $s_\lambda \cdot V$  where  $\lambda$  is doubly even. This implies that  $\lambda + \delta = (2a_1 + 1, 2a_1, 2a_2 + 1, 2a_2, \dots)$  with  $a_i > a_{i+1}$ . In other words,  $\lambda + \delta \sim (\gamma + \mathbf{1}) \cup \gamma$  with  $\gamma + \mathbf{1} \in \mathfrak{A}_1$  and  $\gamma \in \mathfrak{A}_2$ , where  $\mathbf{1}$  is the all-ones vector. See Figure 2 for an example.

It follows that we may write:

$$\langle G, x^{\beta \cup \gamma} \rangle = \begin{cases} \pm \frac{C}{\sqrt{N!}} r^{(|\lambda| + \frac{N(N-1)}{2})} & \beta = (\gamma + \mathbf{1}), \quad \lambda + \delta \sim (\gamma + \mathbf{1}) \cup \gamma, \\ 0 & \text{otherwise.} \end{cases} \quad (42)$$

Suppose we index  $M(G)$  such that the  $i$ th column is indexed by  $\gamma^{(i)}$ , and the  $i$ th row is indexed by  $\gamma^{(i)} + \mathbf{1}$ . Then  $M(G)$  is in fact a diagonal matrix. And given the functional form of  $G$ , we have that the diagonal terms will include:

- $\pm \frac{C}{\sqrt{N!}} r^{(0 + \frac{N(N-1)}{2})}$  repeated  $p(0)$  times,
- $\pm \frac{C}{\sqrt{N!}} r^{(4 + \frac{N(N-1)}{2})}$  repeated  $p(1)$  times,
- $\pm \frac{C}{\sqrt{N!}} r^{(8 + \frac{N(N-1)}{2})}$  repeated  $p(2)$  times,
- $\dots$
- $\pm \frac{C}{\sqrt{N!}} r^{(4k + \frac{N(N-1)}{2})}$  repeated  $p(k)$  times.

Second, let us consider  $M(f_1 \otimes \dots \otimes f_N)$ . We can calculate the inner product of a rank-one function as the product of orbital inner products:

$$\langle f_1 \otimes \dots \otimes f_N, x^{\beta \cup \gamma} \rangle = \prod_{n=1}^{N/2} \langle f_n, y^{\beta_n} \rangle \prod_{n=1}^{N/2} \langle f_{N/2+n}, y^{\gamma_n} \rangle \quad (43)$$

where we introduce  $y \in \mathbb{C}$  as a one-dimensional dummy variable for integration.

Define vectors  $u \in \mathbb{C}^{|\mathfrak{A}_1|}$  and  $v \in \mathbb{C}^{|\mathfrak{A}_2|}$  such that

$$u_\beta = \prod_{n=1}^{N/2} \langle f_n, y^{\beta_n} \rangle, \quad (44)$$

$$v_\gamma = \prod_{n=1}^{N/2} \langle f_{N/2+n}, y^{\gamma_n} \rangle. \quad (45)$$

Then it's clear that  $M(f_1 \otimes \dots \otimes f_N) = uv^T$ , i.e. it is rank-one. Consequently, because  $F$  is the sum of  $L \cdot N!$  rank-one tensors,  $M(F)$  will be rank at most  $L \cdot N!$ .

So we finally pass from tensors to matrices, and lower bound via the Frobenius norm  $\|\cdot\|_F$ :

$$\|F - G\|^2 \geq N! \cdot \sum_{\alpha \in \mathbb{N}_{\geq}^N} (\langle F, x^\alpha \rangle - \langle G, x^\alpha \rangle)^2 \quad (46)$$

$$\geq N! \cdot \|M(F) - M(G)\|_F^2 \quad (47)$$

Thus, because  $M(F)$  is low-rank and  $M(G)$  is chosen to be diagonal, we have an approachable infinite-dimensional matrix low-rank approximation problem.

### A.3 DERIVING THE BOUND

By SVD, the optimal choice for  $F$  is to produce a diagonal matrix  $M(F)$  of rank  $L \cdot N!$  with the maximal singular values of  $G$  along the diagonal. So it only remains to calculate these terms, and lower bound the approximation.

So suppose we choose  $L \leq e^{N^2}$ . Noting that  $N^N \leq e^{N^2}/14$  for  $N \geq 3$ :

$$L \cdot N! \leq e^{N^2} N^N \quad (48)$$

$$\leq e^{2N^2}/14 \quad (49)$$

$$\leq p(N^4) \quad (50)$$

where the last line follows from Corollary 3.1 in Maróti (2003).

So clearly  $L \leq e^{N^2}$  guarantees that  $L \cdot N! \leq \sum_{k=0}^{N^4} p(k)$ .

Thus, since  $M(F)$  is constrained to have rank  $\leq L \cdot N!$ , it will be diagonal with  $\leq \sum_{k=0}^{N^4} p(k)$  terms, so that:

$$\|F - G\|^2 \geq N! \cdot \|M(F) - M(G)\|_F^2 \quad (51)$$

$$\geq N! \cdot \sum_{k=N^4+1}^{\infty} \left( \pm \frac{C}{\sqrt{N!}} r^{(4k + \frac{N(N-1)}{2})} \right)^2 p(k) \quad (52)$$

$$= C^2 r^{N(N-1)} \sum_{k=N^4+1}^{\infty} r^{8k} p(k) \quad (53)$$

$$= 1 - C^2 r^{N(N-1)} \sum_{k=0}^{N^4} r^{8k} p(k) \quad (54)$$

where the last line follows as  $C$  was chosen so that  $C^2 r^{N(N-1)} \sum_{k=0}^{\infty} r^{8k} p(k) = 1$ .

Note that

$$\sum_{k=0}^{N^4} r^{8k} p(k) \leq \prod_{k=1}^{N^4} \frac{1}{1 - r^{8k}} \quad (55)$$

as the LHS is the generating function for partitions  $\lambda$  with  $|\lambda| \leq N^4$ , and the RHS is the generating function for partitions with all parts  $\leq N^4$ , which clearly dominates the LHS termwise.

So plugging back in the definition of  $C = (r^{-N(N-1)} \prod_{k=1}^{\infty} (1 - r^{8k}))^{1/2}$ :

$$\|F - G\|^2 \geq 1 - C^2 r^{N(N-1)} \prod_{k=1}^{N^4} \frac{1}{1 - r^{8k}} \quad (56)$$

$$= 1 - \prod_{k=N^4+1}^{\infty} (1 - r^{8k}). \quad (57)$$

Finally, by choosing  $r = 1 - \frac{1}{8N^4+8}$ , we have:

$$1 - \prod_{k=N^4+1}^{\infty} (1 - r^{8k}) \geq 1 - (1 - r^{8N^4+8}) \quad (58)$$

$$= \left(1 - \frac{1}{8N^4+8}\right)^{8N^4+8} \quad (59)$$

$$\geq \left(1 - \frac{1}{16}\right)^{16} \quad (60)$$

$$\geq \frac{3}{10}, \quad (61)$$

where we use that the limit  $(1 - \frac{1}{n})^n$  increases monotonically in  $n$ . Hence, we conclude:

$$\|F - G\|^2 \geq \frac{3}{10}. \quad (62)$$

#### A.4 EFFICIENCY OF REPRESENTING $G$

We remind the representation, where with  $r = 1 - \frac{1}{8N^4+8}$  we have:

$$G = C\sqrt{N!} \cdot \prod_{i < j} \frac{1}{1 - r^4 x_i^2 x_j^2} \cdot \mathcal{A}(\phi_1^{(r)} \otimes \cdots \otimes \phi_N^{(r)}) \quad (63)$$

with

$$\phi_j^{(r)}(x_i) = \begin{cases} rx_i((rx_i)^2)^{N/2-j}(1+(rx_i)^4)^{j-1} & 1 \leq j \leq N/2, \\ ((rx_i)^2)^{N-j}(1+(rx_i)^4)^{j-1-N/2} & N/2+1 \leq j \leq N. \end{cases} \quad (64)$$

So it remains to characterize some  $\hat{G}$  in the Jastrow ansatz, parameterized with neural networks, that approximates  $G$ .

First, we make mention that, for very specific activations, this function  $G$  may be written exactly in the Jastrow ansatz.

After fixing the value of  $r$ , we can consider each  $\phi_i := \phi_i^{(r)}$  as an activation function acting on a one-dimensional input. Consider also the “activation”  $\psi(x_i, x_j) = \frac{1}{1-r^4 x_i^2 x_j^2}$ . Then  $G$  can be clearly written exactly in the Jastrow ansatz (where the Jastrow term  $J$  is given as a symmetric network with product pooling) as

$$G = C\sqrt{N!} \cdot J(x) \cdot \mathcal{A}(\phi_1 \otimes \cdots \otimes \phi_N) \quad (65)$$

$$= C\sqrt{N!} \cdot \prod_{i < j} \psi(x_i, x_j) \cdot \mathcal{A}(\phi_1 \otimes \cdots \otimes \phi_N) \quad (66)$$

We now consider approximation error under a more typical choice of activation function. We will use the modReLU Arjovsky et al. (2016):

$$\sigma(z) = \begin{cases} 0 & |z| \leq 1 \\ z - \frac{z}{|z|} & |z| \geq 1 \end{cases} \quad (67)$$

We consider first the Jastrow factor. We will approximate it in  $\hat{G}$  using a Relational Network (Santoro et al., 2017) with multiplication pooling.

Note that on our domain  $(S^1)^N$ , we have  $1/2 < \frac{1}{|1-r^4 x_i^2 x_j^2|} < 8N^4 + 8$ . The Lipschitz norm of this function is also polynomially bounded, and therefore from Theorem 1 in Caragea et al. (2022) it is standard to approximate this function with a complex neural network  $g$  with width, depth, and weights all in  $O(\text{poly}(N, 1/\epsilon))$ , such that  $\|g\|_\infty \leq 8N^4 + 8 + \epsilon$  and

$$\left\| \frac{1}{1-r^4 x_i^2 x_j^2} - g(x_i, x_j) \right\|_\infty \leq \epsilon. \quad (68)$$

Assuming  $\epsilon < 1$ , it follows from routine calculation that

$$\left\| \prod_{i < j} \frac{1}{1-r^4 x_i^2 x_j^2} - \prod_{i < j} g(x_i, x_j) \right\|_\infty \leq N^{O(N)} \epsilon. \quad (69)$$

Consider second the antisymmetric factor. Following the row transforms given in the proof of Lemma 3.4 in Ishikawa et al. (2006), the antisymmetric term may be equivalently written as:

$$\mathcal{A}(\phi_1^{(r)} \otimes \cdots \otimes \phi_N^{(r)}) = \mathcal{A}(\psi_1^{(r)} \otimes \cdots \otimes \psi_N^{(r)}) \quad (70)$$

with

$$\psi_j^{(r)}(x_i) = \begin{cases} rx_i((rx_i)^2)^{N/2-j}(1+(rx_i)^4)^{j-1} & 1 \leq j \leq N/2, \\ ((rx_i)^2)^{N-j}(1+(rx_i)^4)^{j-1-N/2} & N/2+1 \leq j \leq N. \end{cases} \quad (71)$$

It's easy to confirm that restricted to  $S^1$ ,  $\|\psi^{(r)}\|_\infty \leq 2$ , and  $\text{Lip}(\psi^{(r)}) = O(\text{poly}(N))$ . Therefore, it is routine again by Theorem 1 in Caragea et al. (2022) to approximate any  $\psi^{(r)}$  with a neural network  $\hat{\psi}$  parameterized with width, depth and weights  $O(\text{poly}(N, 1/\epsilon))$  such that

$$\|\psi^{(r)} - \hat{\psi}\|_\infty \leq \epsilon. \quad (72)$$

We also clearly have that  $\|\hat{\psi}\|_\infty \leq 2 + \epsilon$ . Now, we calculate:

$$\left\| \mathcal{A}(\psi_1^{(r)} \otimes \dots \otimes \psi_N^{(r)}) - \mathcal{A}(\hat{\psi}_1 \otimes \dots \otimes \hat{\psi}_N) \right\|_\infty = \left\| \frac{1}{N!} \sum_{\sigma} (-1)^\sigma \left( \psi_{\sigma(1)}^{(r)} \otimes \dots \otimes \psi_{\sigma(N)}^{(r)} - \hat{\psi}_{\sigma(1)} \otimes \dots \otimes \hat{\psi}_{\sigma(N)} \right) \right\|_\infty \quad (73)$$

$$\leq \frac{1}{N!} \sum_{\sigma} \left\| \left( \psi_{\sigma(1)}^{(r)} \otimes \dots \otimes \psi_{\sigma(N)}^{(r)} - \hat{\psi}_{\sigma(1)} \otimes \dots \otimes \hat{\psi}_{\sigma(N)} \right) \right\|_\infty \quad (74)$$

$$< N 3^{N-1} \epsilon \quad (75)$$

Finally, we combine the Jastrow factor and antisymmetric component. Let

$$\hat{G}(x) = C\sqrt{N!} \prod_{i < j} g(x_i, x_j) \mathcal{A}(\hat{\psi}_1 \otimes \dots \otimes \hat{\psi}_N)(x). \quad (76)$$

Then we calculate:

$$\|G - \hat{G}\|_\infty = C\sqrt{N!} \left\| \prod_{i < j} \frac{1}{1 - r^4 x_i^2 x_j^2} \cdot \mathcal{A}(\phi_1^{(r)} \otimes \dots \otimes \phi_N^{(r)}) - \prod_{i < j} g(x_i, x_j) \cdot \mathcal{A}(\hat{\psi}_1 \otimes \dots \otimes \hat{\psi}_N) \right\|_\infty \quad (77)$$

$$\leq N^{O(N)} \epsilon. \quad (78)$$

So it remains to rescale  $\epsilon \rightarrow \frac{\epsilon}{N^{O(N)}}$ , which yields the expected bounds on width.  $\square$
